# Supplementary material for: Transcriptional landscapes of emerging autoimmunity: transient aberrations in the targeted tissue’s extracellular milieu precede immune responses in Sjögren’s syndrome
Source: PubMed Central journal article supplement (PMC3978466; doi:10.1186/ar4362), 2013-10-31

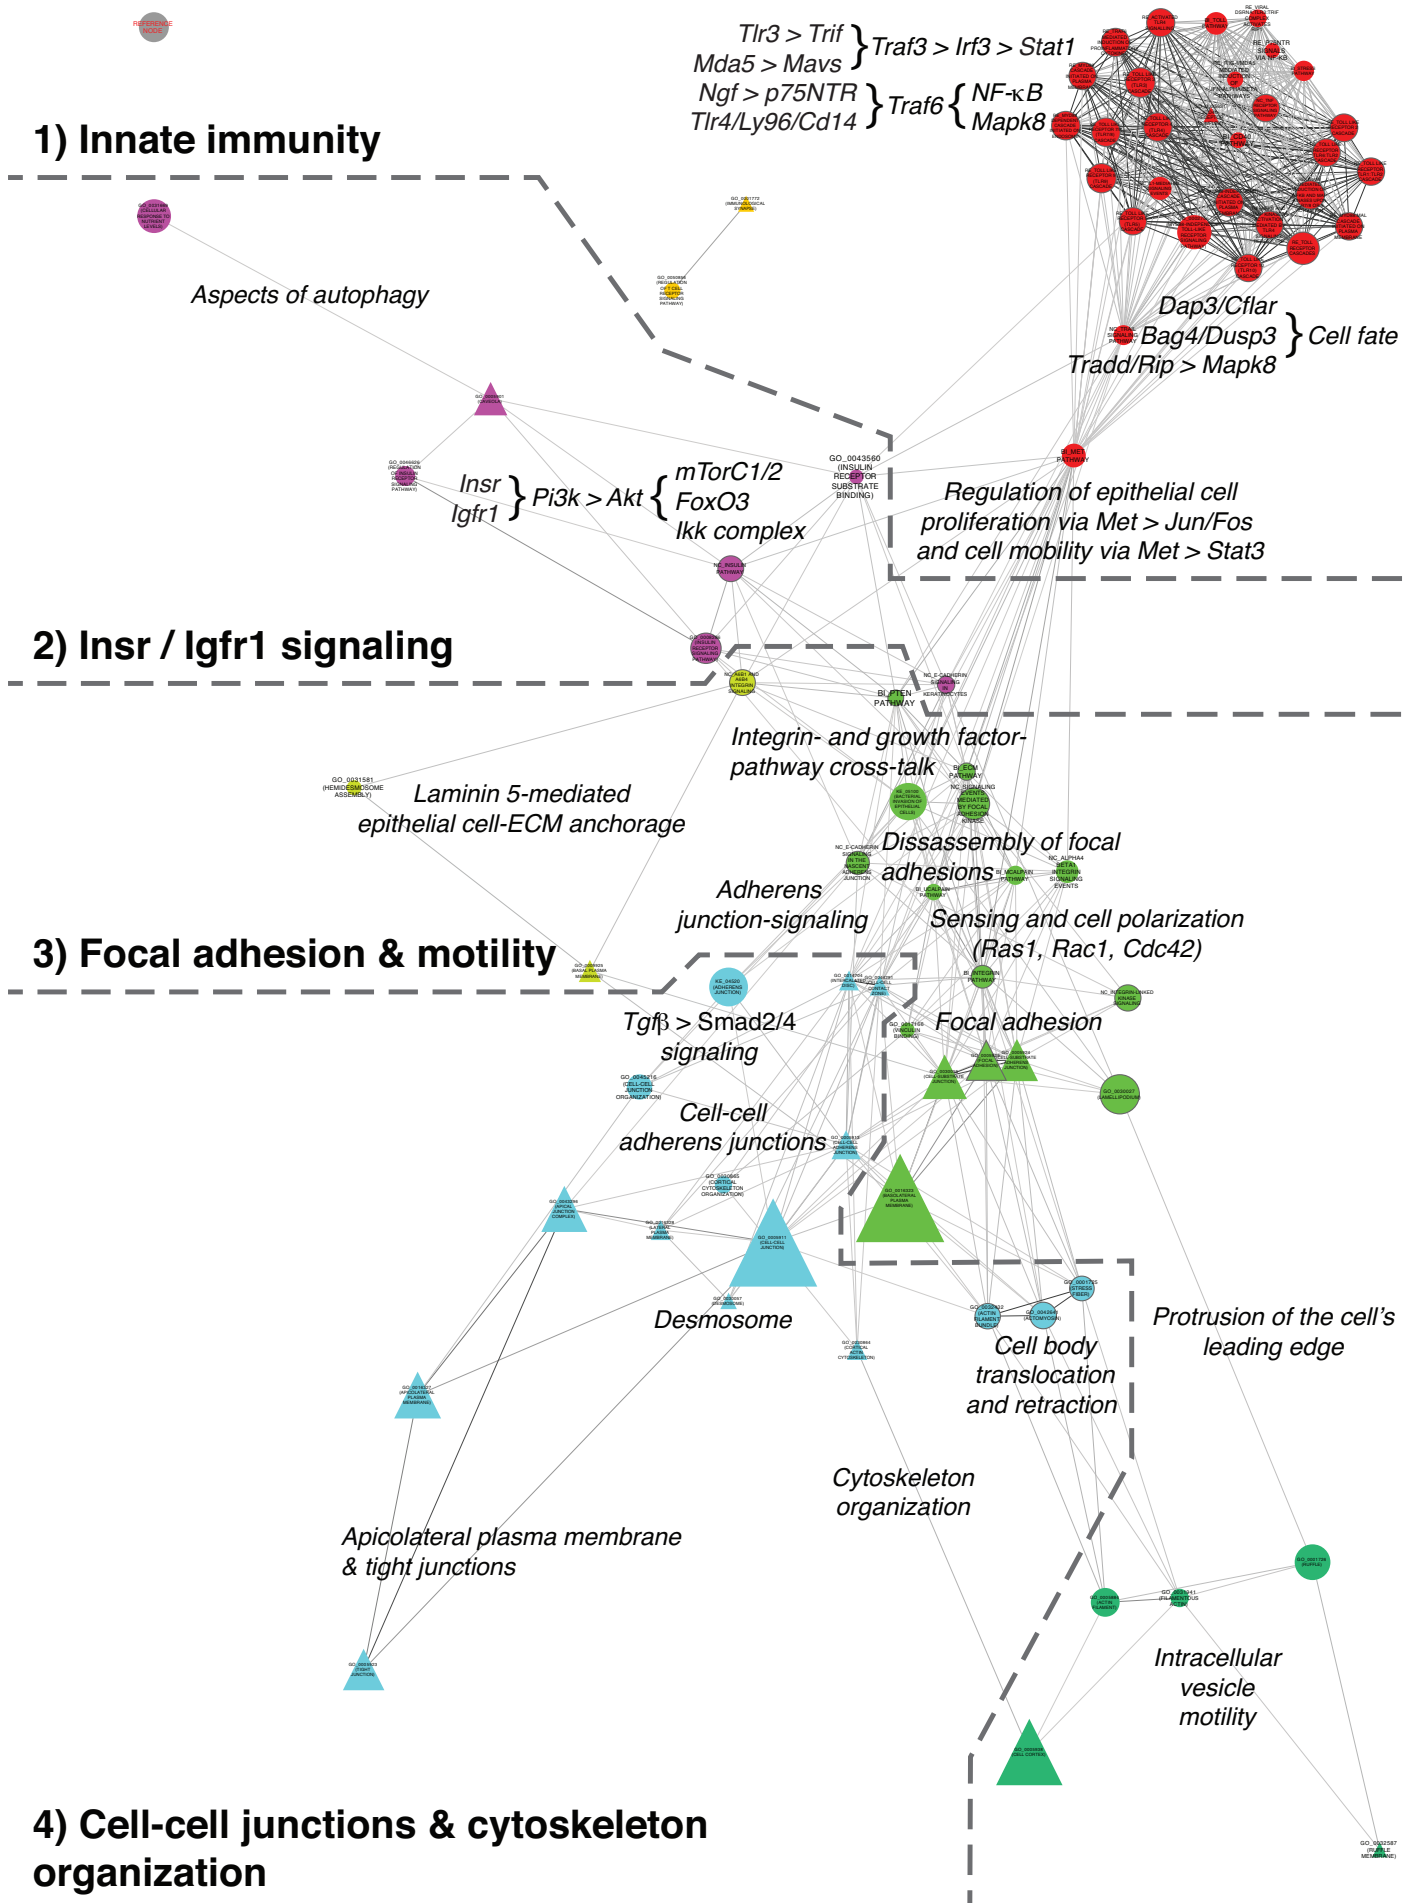

REFERENCE NODE

# 1) Innate immunity

pdk1  
pik3ca  
pik3r1  
src

abca1  
prkca  
prkcd  
prkcz  
ptpre  
rela

cbl  
foxo3  
grb14  
grb2

bcl10  
dusp3  
ptprj

CLUSTER 01-01

map2k3  
map2k4  
map2k7  
map3k7  
mapk14  
mapk3  
mapk8  
mapkap3  
mef2a  
mef2c  
nfkb2  
ppp2cb  
rela

atf2  
chuk  
dusp3  
fos  
jun

ikkbk  
traf6

rps6ka3  
rps6ka5  
tab3

mapk2  
mapk4  
nfkb1  
nfkb2  
ngf  
prkac  
prkcz

ptpn11  
ptpra  
sorbs1

adipor1  
akt1  
akt2  
enpp1

irs1

CLUSTER 02

mapk3  
mapk8  
mapkap3  
mef2a  
mef2c  
nfkb2  
ppp2cb  
rela

ikkbk  
traf6

rps6ka3  
rps6ka5  
tab3

mapk2  
mapk4  
nfkb1  
nfkb2  
ngf  
prkac  
prkcz

# 2) Insr / Igfr1 signaling

itgb4  
lama3  
lamb3  
lamc2

col17a1  
erb2  
erb3  
itgb1

met

CLUSTER 03-02

ctnna1  
cttn  
dock1  
lik  
igap1  
jup  
keap1  
lama3  
lims2  
lpp  
luc7l3  
nexn  
numb  
pak1  
pdlim7  
plec  
ptk2  
pxn  
rfwd2  
scrib  
sorbs1  
capn1  
capns1  
syne2  
tenc1  
tjp1

rac1  
src  
tln1  
actn1  
flnb  
git1  
tns1  
tns4

vasp  
vcl  
zfp384  
zyx  
abi1  
akt1  
arhgef7  
pdk2  
pdk1  
pik3ca

# 3) Focal adhesion & motility

amot  
anxa2  
dcl1  
enah  
fermt2  
flnb  
ilk  
myh11  
myh14  
palld  
pdlim7  
ptpn11  
sorbs1

apc  
arhgap17  
ash11  
cgn  
cldn7  
ctnna1  
ctnnd1  
ctnnd1  
im07  
map3k7  
mllt4

lin7c  
marveld2  
micall2  
mpdz  
mpp5  
mpp7  
mtdh  
ocln  
pak1  
ptk2

synpo  
tjap1  
tjp1  
tjp2

actn1  
actn4

actn1  
actn4

actn1  
actn4

actn1  
actn4

actn1  
actn4

actn1  
actn4

tmsb15l  
tpm1  
tpm3  
vcl  
zyx

jup  
plekha7  
dsg2  
dsp  
itgb1

shroom2  
shroom3

epcam  
f11r  
inadl  
jam2

actn1  
actn4

actn1  
actn4

actn1  
actn4

actn1  
actn4

actn1  
actn4

actn1  
actn4

# 4) Cell-cell junctions & cytoskeleton organization

spna2  
gja1

cdc42  
cdh1

9030425e11rik

lgl1  
ppp1r1a  
scn1a

actn1  
actn4

actn1  
actn4

actn1  
actn4

actn1  
actn4

actn1  
actn4

actn1  
actn4

myo9b  
plekha1  
synj2  
tmod3  
tmsb15l  
tpm1

myo6

myo6

myo6

myo6

myo6

myo6

myo6

myo6

myo6

# 1) ECM turnover

REFERENCE NODE

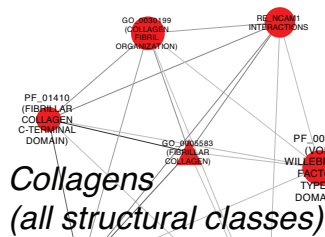

**Collagens (all structural classes)**

Contact activation pathway (coagulation)

BI-INTRINSIC PATHWAY

# 3) Neurotransmission

Positive regulation of nerve impulses

Cys-loop receptors (all categories)

Angioinhibitory signals

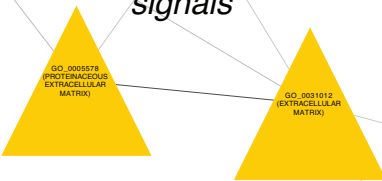

Formation and structural organization of the ECM

Mmp-mediated collagenolysis

# 2) Gap junctions

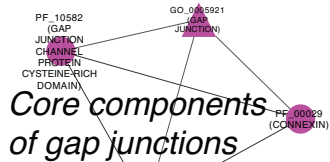

Core components of gap junctions

A

# 1) ECM turnover

REFERENCE NODE

col1a1  
col1a2  
col2a1  
col3a1

col5a1  
col5a2  
col5a3  
col6a1  
col6a2  
col6a3

col4a1  
col4a2  
col4a3  
col4a4  
col4a5  
col4a6  
col9a1

CLUSTER 01-01

# 3) Neurotransmission

gria1  
gria2  
gria3  
gria4  
grid2  
grik1  
grik2  
grik3

grik4  
grik5  
grin1  
grin2a  
grin2b  
grin2c

grin2d  
grin3a

CLUSTER 03

# 2) Gap junctions

gja10  
gja5  
gja8  
gjb2  
gjb3  
gjb4  
gjb5

CLUSTER 02

fbn1  
fbn2  
mfap2  
slc1a3  
thsd4

GO\_0043205 (FIBRIL)

# 3) Neurotransmission

hmcn1  
igf1  
mmp9  
mmp10  
mmp11  
mmp13  
mmp14  
mmp16  
mmp19  
mmp1a  
mmp1b  
mmp2  
mmp20  
mmp23  
mmp8

mmp9  
muc2  
nid1  
nptn  
optc  
papln  
pdxn  
sftpd  
smoc2  
sparc  
spock1  
spon2  
thbs2  
thsd4  
tnr  
vit  
wnt10a  
wnt2  
wnt3a  
wnt9a  
zfp1

ache  
adams12  
adams16  
adams19  
adams20  
adams5  
adams7  
adams8  
adams9  
adams11  
adams12

adams12  
adams16  
adams19  
adams20  
adams5  
adams7  
adams8  
adams9  
adams11  
adams12

B

# 1) Adaptive immunity

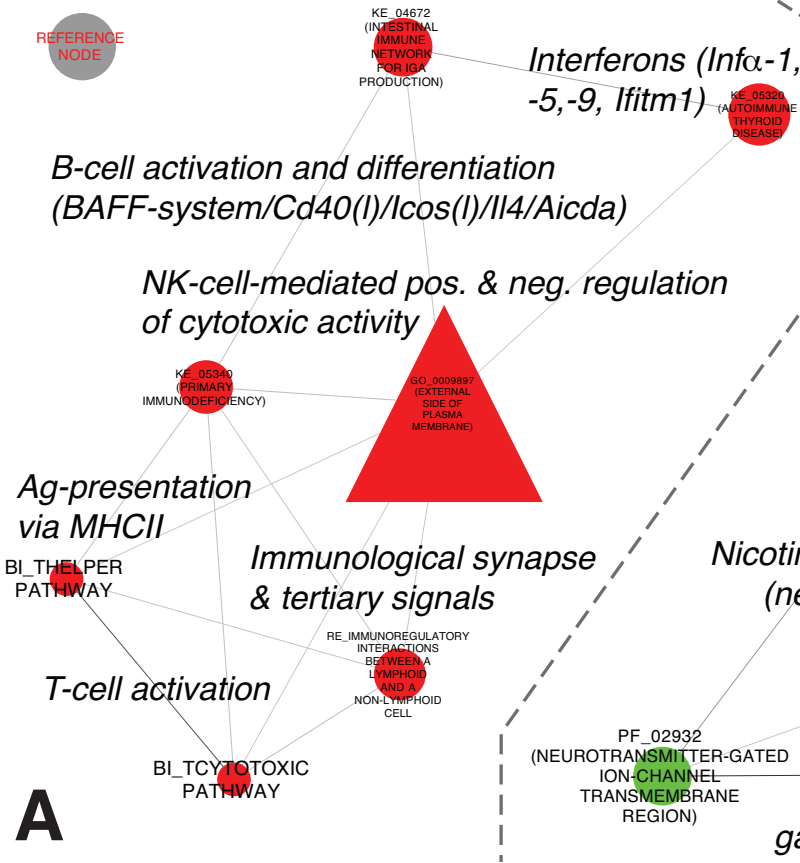

A

# 2) Neurotransmission (partial reversal)

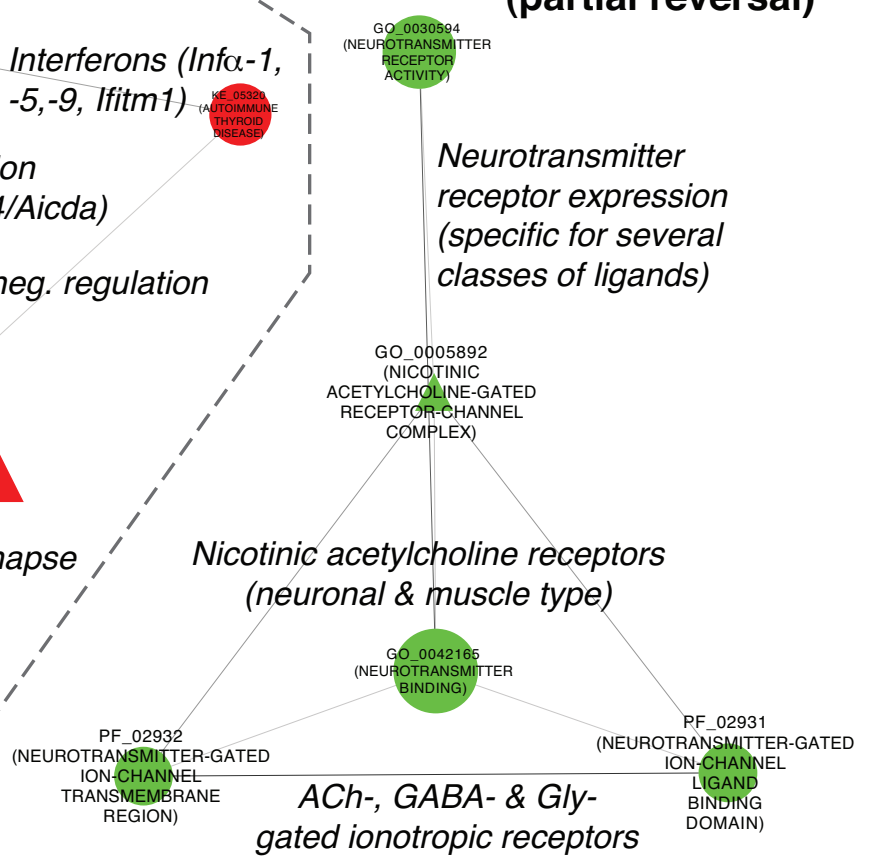

# 1) Adaptive immunity

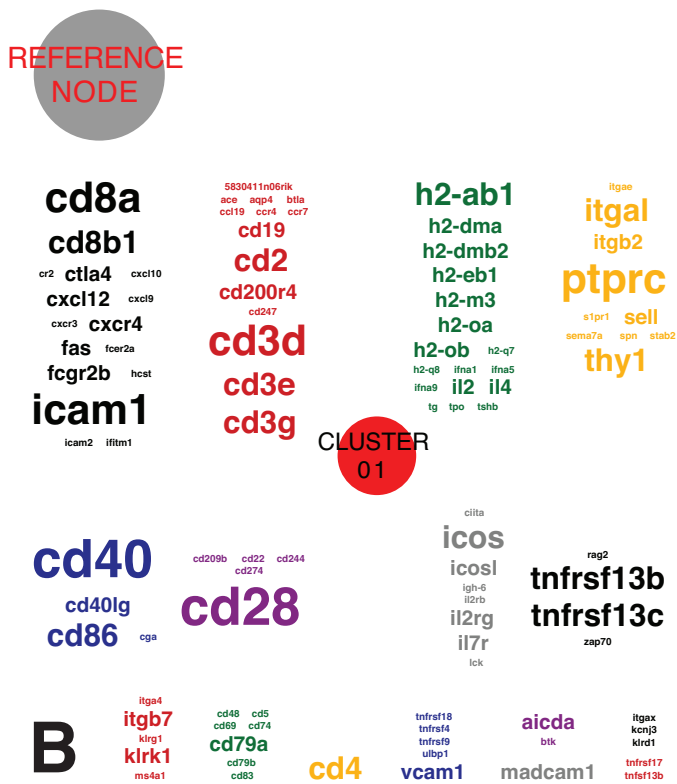

B

# 2) Neurotransmission (partial reversal)

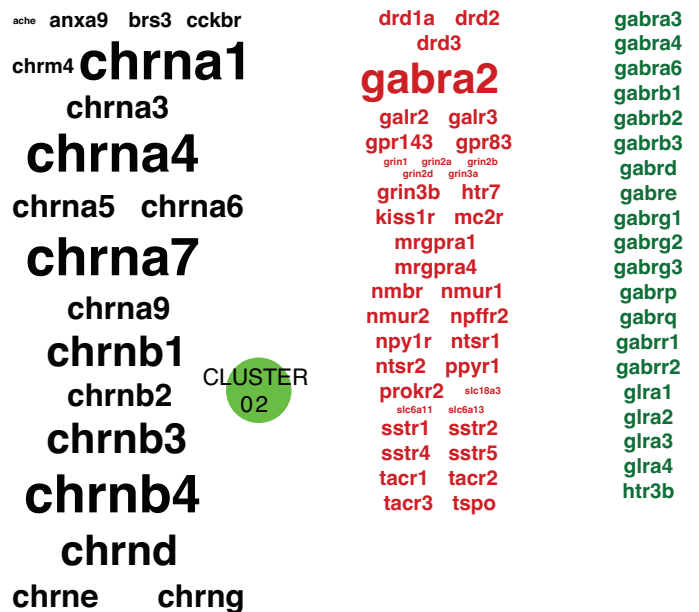

# 1) Focal adhesion & cell-cell junctions (partial reversal)

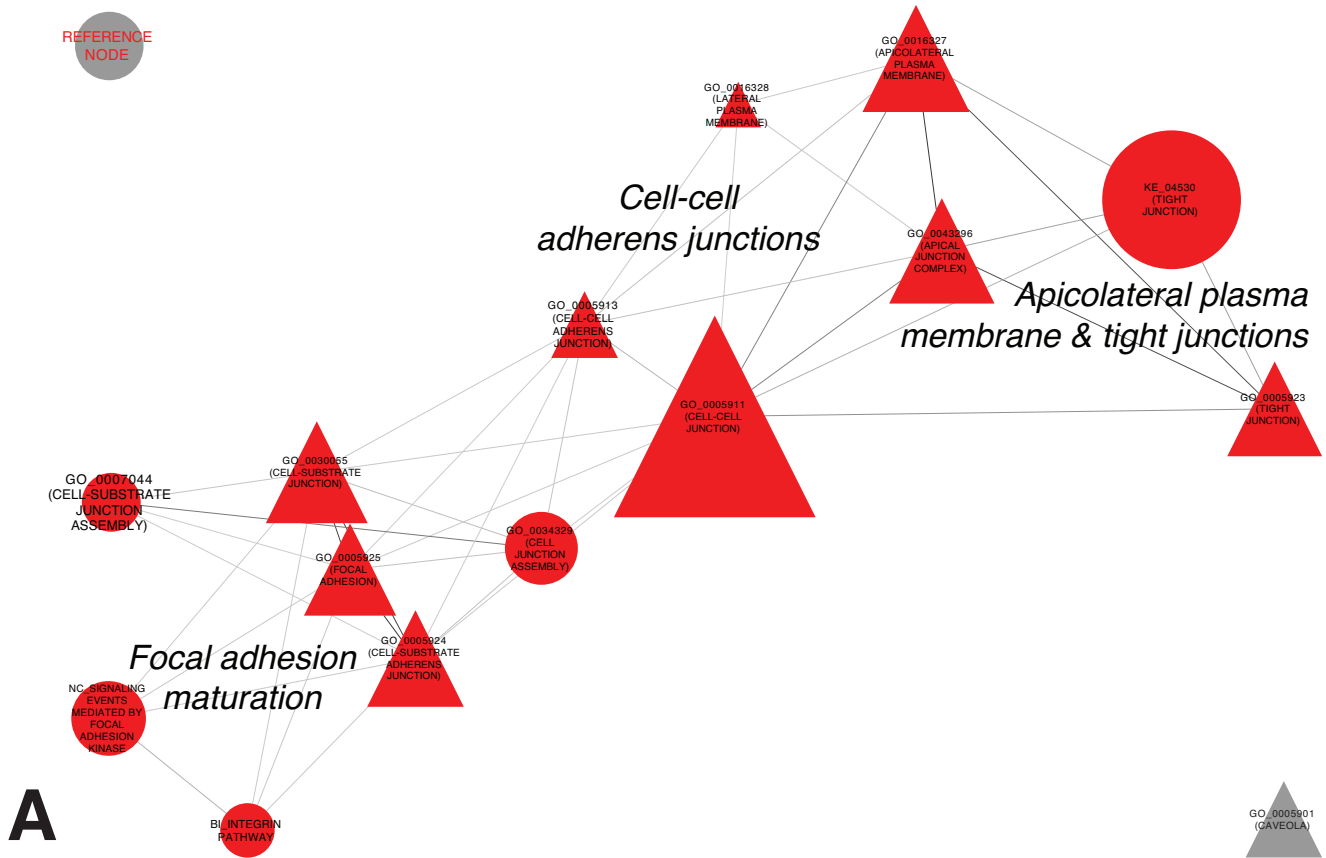

# 1) Focal adhesion & cell-cell junctions (partial reversal)

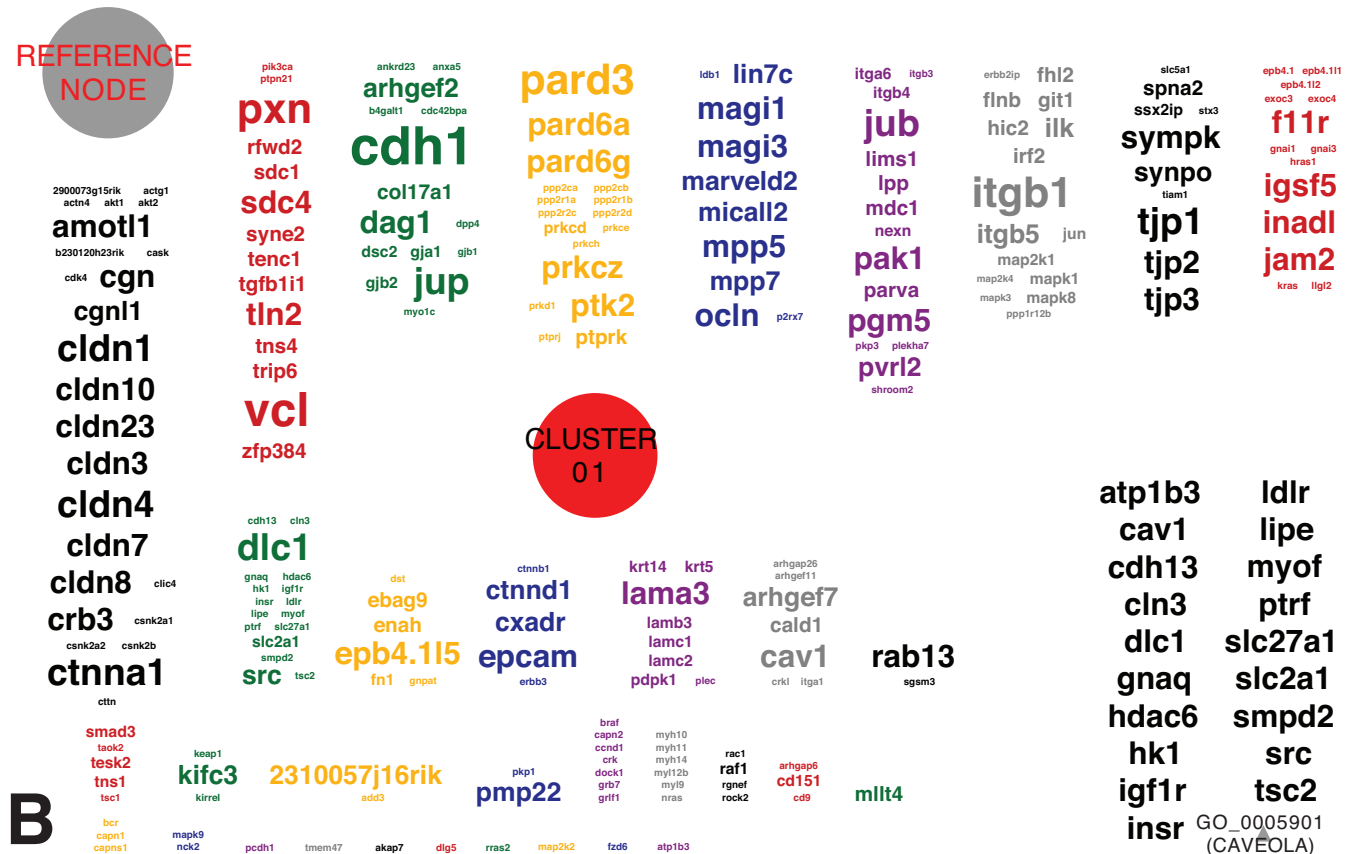

Supplement: ar4362-S3.pdf [file ar4362-S3.pdf]
